# Supplementary material for: Bioactive polyamine production by a novel hybrid system comprising multiple indigenous gut bacterial strategies
Source: PubMed Central journal article supplement — Sci Adv. 2018 Jun 27;4(6):eaat0062. doi: 10.1126/sciadv.aat0062 (PMC6021145; doi:10.1126/sciadv.aat0062), 2018-06-27
Supplement: aat0062_SM.pdf [file aat0062_SM.pdf]

## Supplementary Materials for

### Bioactive polyamine production by a novel hybrid system comprising multiple indigenous gut bacterial strategies

Yusuke Kitada, Koji Muramatsu, Hirokazu Toju, Ryoko Kibe, Yoshimi Benno, Shin Kurihara, Mitsuharu Matsumoto

Published 27 June 2018, *Sci. Adv.* **4**, eaat0062 (2018)  
DOI: 10.1126/sciadv.aat0062

#### This PDF file includes:

- fig. S1. Induction of putrescine production by coculture of *E. coli* and *En. faecalis*.
- fig. S2. Effects of extracellular pH and glucose concentration on bacterial metabolism in monocultures of *En. faecalis* and *E. coli*.
- fig. S3. Viable bacterial counts and change of extracellular pH in cocultures of putrescine-deficient *E. coli* (SK930), wild-type *En. faecalis* (V583), and each *Bifidobacterium* sp.
- fig. S4. Viable bacterial counts in feces of gnotobiotic mice.
- fig. S5. Extracellular putrescine concentration and total viable bacterial counts in human feces incubated at different pH values ( $n = 5$ ).
- fig. S6. Effect of pH on extracellular agmatine concentration in monocultures of *E. coli*, *Ci. youngae*, and *F. varium*.
- fig. S7. Symbiont-symbiont co-occurrence networks of key genes in the putrescine production pathway using previously described human microbiome data from U.S. metropolitan areas.
- fig. S8. Symbiont-symbiont co-occurrence network patterns of key genes in the putrescine production pathway using previously described human microbiome data from Venezuela.
- fig. S9. Symbiont-symbiont co-occurrence network patterns of key genes in the putrescine production pathway using previously described human microbiome data from Malawi.
- fig. S10. Mechanistic model of a novel pathway for putrescine production from arginine through agmatine via the collaboration of three different bacterial species.

- fig. S11. Outline of gnotobiotic mouse experiments.
- table S1. List of species expressing homologs of the enzymes AdiA and AdiC, as determined by in silico analyses of 126 bacterial strains present in the human gut.
- table S2. Detection of RNA sequences of AdiA, AdiC, AguA, and AguD by metatranscriptomic analysis of human feces.
- table S3. List of bacteria used for screening of polyamine producing bacteria.
- table S4. Strains, plasmids, and oligonucleotides used in this study.

A

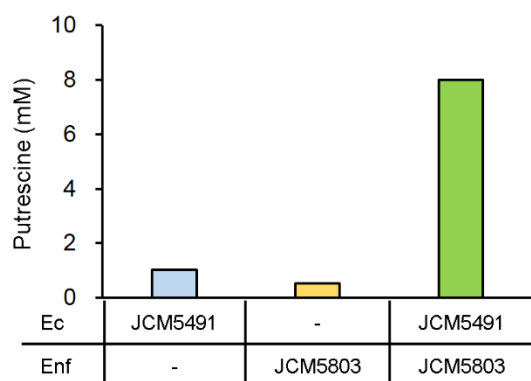

B

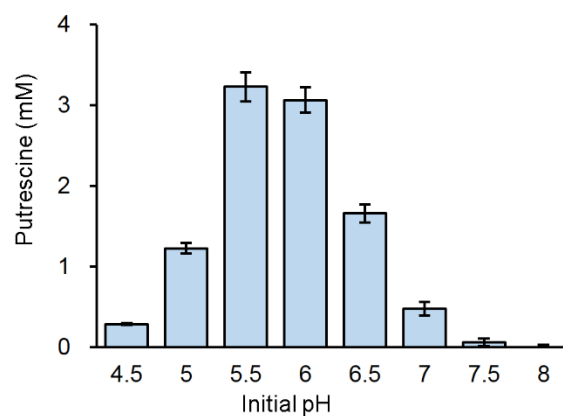

**Fig. S1. Induction of putrescine production by coculture of *E. coli* and *En. faecalis*.**

(A) Extracellular putrescine concentration in monocultures of *E. coli* JCM5491 and *En. faecalis* JCM 5803<sup>T</sup>, and a coculture of both strains. Error bars represent standard errors (SEs). Ec: *E. coli*, Enf: *En. faecalis*. (B) Effect of pH on extracellular putrescine concentration in cocultures of *E. coli* and *En. faecalis*.

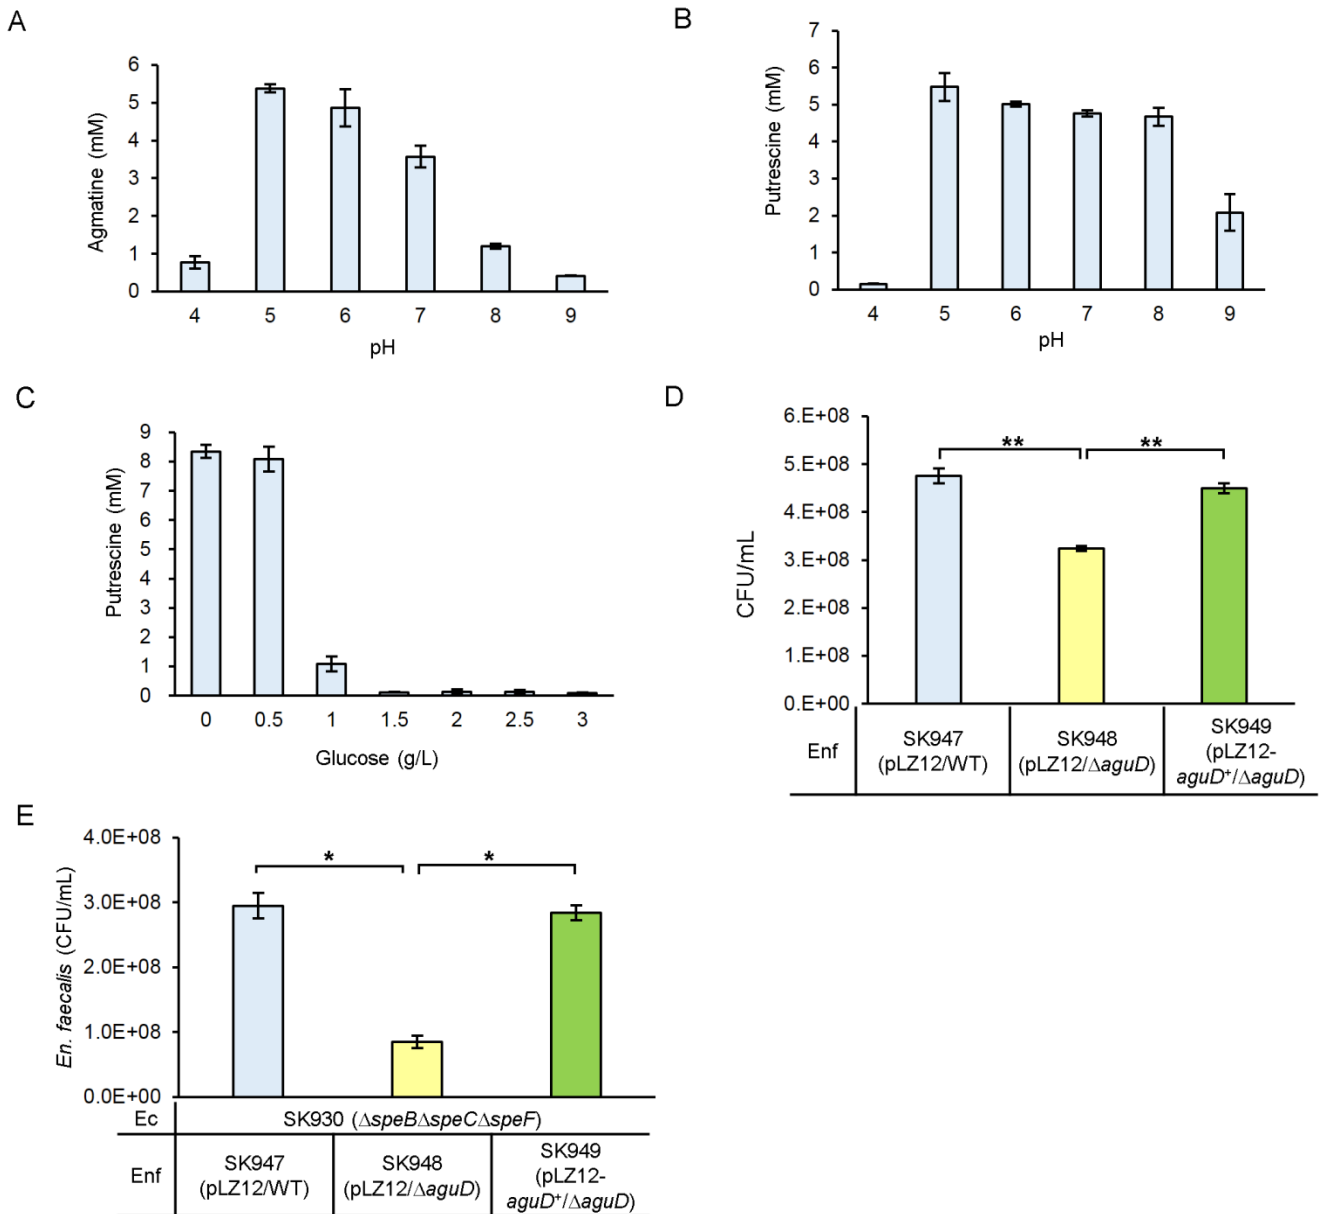

**Fig. S2. Effects of extracellular pH and glucose concentration on bacterial metabolism in monocultures of *En. faecalis* and *E. coli***

(A) Extracellular agmatine concentration in monocultures of wild-type *E. coli* (MG1655) in LB-RGC at different pH. (B) Extracellular putrescine concentrations in monocultures of wild-type *En. faecalis* (V583) cultured in medium at different pH values containing 5 mM agmatine. (C) Extracellular putrescine concentration in a monoculture of wild-type *En. faecalis* (V583) in medium containing 5 mM agmatine and different concentrations of glucose. (D) Viable cell count of wild-type *En. faecalis* (SK947), *aguD*-deleted *En. faecalis* (SK948), or *aguD*-complemented *En. faecalis* (SK949) monocultured in medium containing 5 mM agmatine at pH 6. (E) Viable cell counts of *En. faecalis* when putrescine-deficient *E. coli* (SK930) was cocultured with wild-type *En. faecalis* (SK947), *aguD*-deleted *En. faecalis* (SK948), or *aguD*-complemented *En. faecalis* (SK949) in LB-RGC medium. Mono- and cocultures of these bacteria were conducted under anaerobic conditions at 37°C for 24 h. Error bars represent SEs. Student's *t*-tests; \**p* < 0.05, \*\**p* < 0.01. Enf: *En. faecalis*

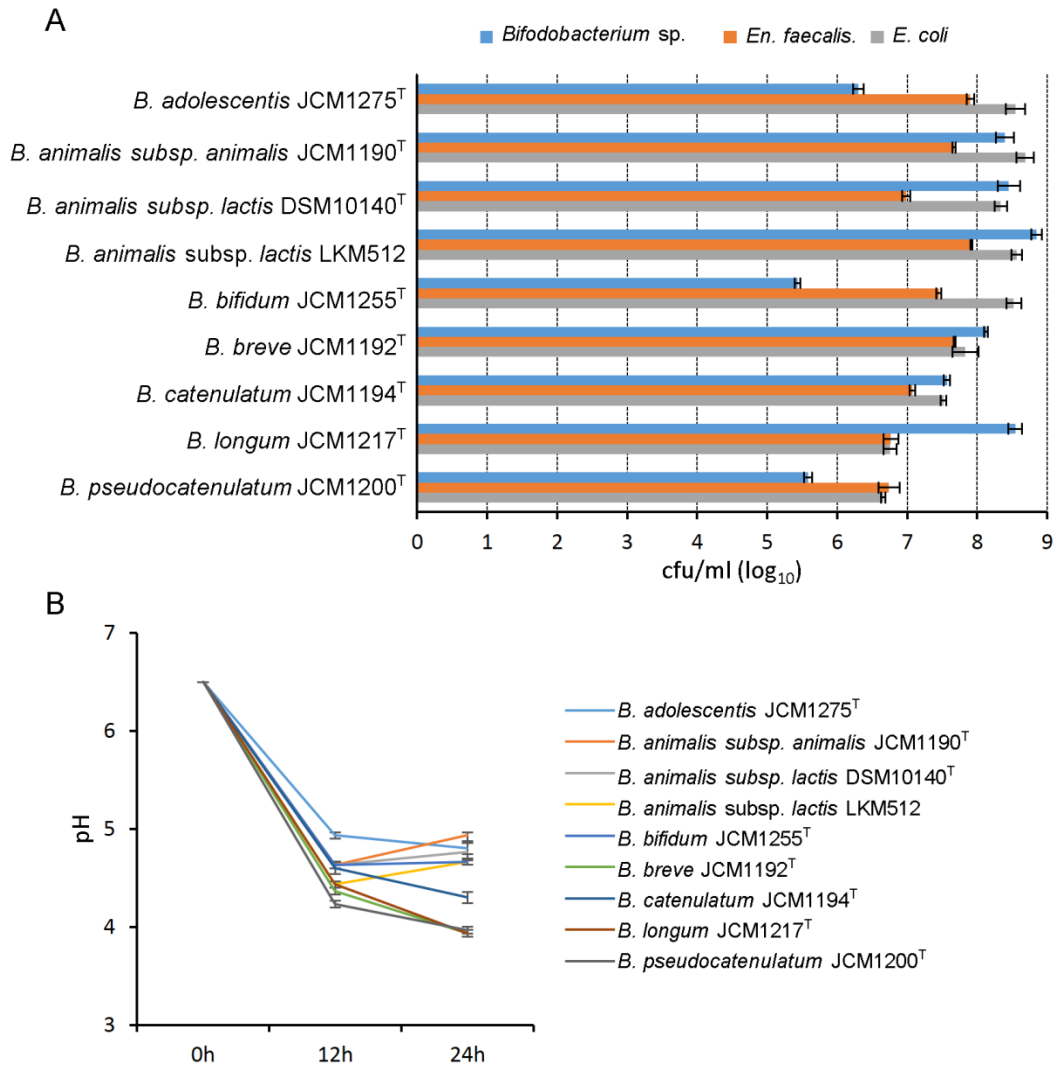

**Fig. S3. Viable bacterial counts and change of extracellular pH in cocultures of putrescine-deficient *E. coli* (SK930), wild-type *En. faecalis* (V583), and each *Bifidobacterium* sp.**

(A) Viable bacterial counts. Coculture of these bacteria was conducted under anaerobic conditions at 37 °C for 24 h in LB medium containing 5 mM L-arginine, 1.5 g/L D-glucose, 5 g/L galacto-oligosaccharide, 2 mM MgSO<sub>4</sub>, 60 mM NH<sub>4</sub>Cl, and 0.5 g/L L-cysteine-hydrochloride (pH 6.5). (B) Change of extracellular pH.

The cultures of all strains reached pH 5.5, at which point, maximal putrescine production occurred within 12 hours. However, there was no relationship between the viable count of *Bifidobacterium* sp. and pH. Interestingly, we found that the extracellular putrescine concentration positively correlated with the number of both *E. coli* and *En. faecalis*. Specifically, in the culture with *B. animalis* subsp. *lactis* LKM512 or *B. adolescentis* JCM1275, which yielded higher putrescine production, larger numbers of *E. coli* (10<sup>8.5</sup> cfu/ml or more) and *En. faecalis* (10<sup>7.9</sup> cfu/ml or more) were detected, whereas in the culture with *B. longum* JCM1217 or *B. pseudocatenulatum* JCM1200, which induced only slight putrescine production, 10-times lower number of *E. coli* and *En. faecalis* (less than 10<sup>6.8</sup> cfu/ml) were detected.

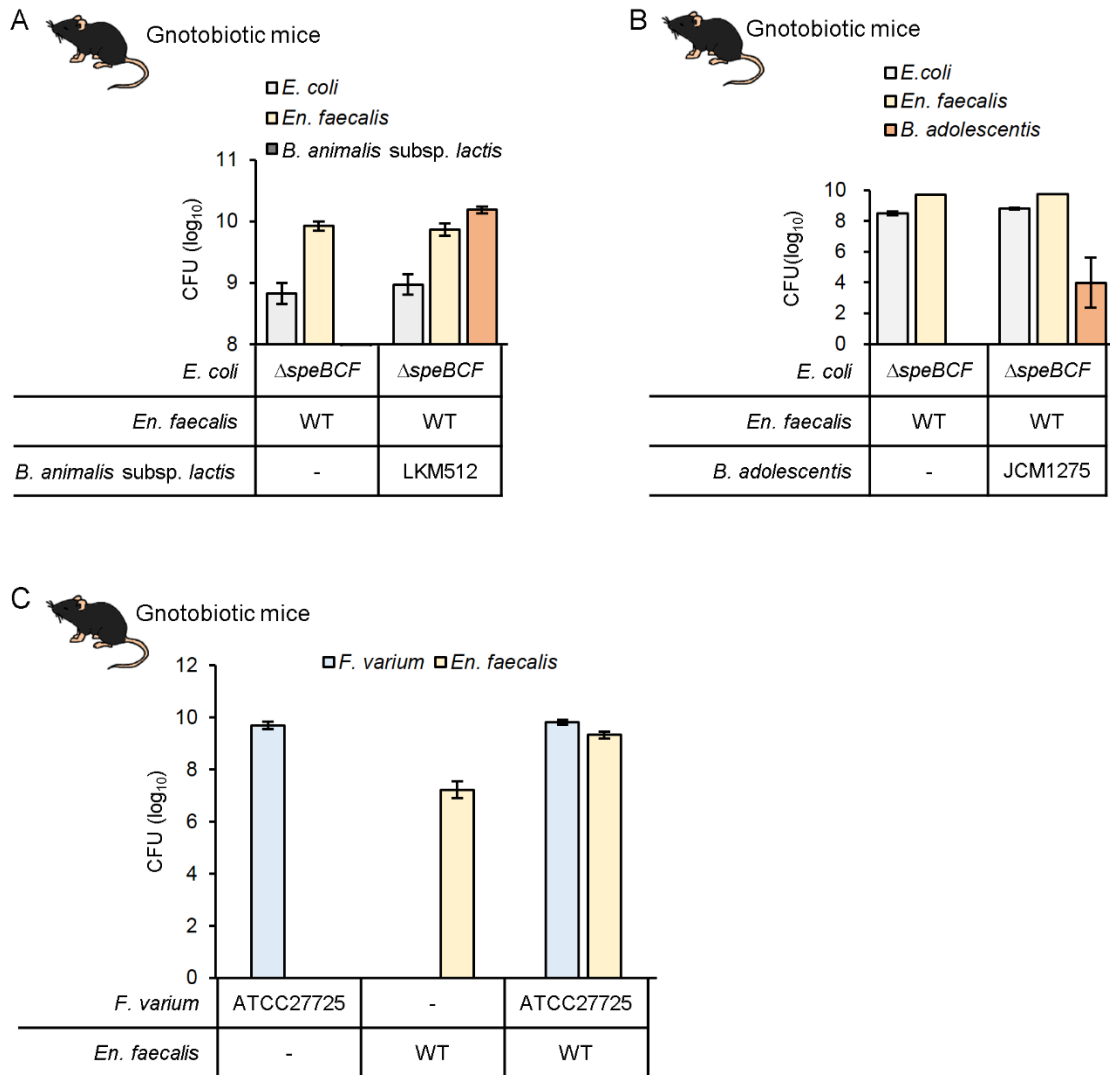

**Fig. S4. Viable bacterial counts in faeces of gnotobiotic mice**

(A) Viable bacterial counts in feces derived from gnotobiotic mice colonized with putrescine-deficient *E. coli* (SK930), wild-type *En. faecalis* (V583), and *B. animalis subsp. lactis* LKM512. (B) Viable bacterial counts in feces derived from gnotobiotic mice colonized with putrescine-deficient *E. coli* (SK930), wild-type *En. faecalis* (V583), and *B. adolescentis* JCM1275<sup>T</sup>. (C) Viable bacterial counts in feces derived from gnotobiotic mice inoculated with *F. varium* ATCC 27725 and wild-type *En. faecalis* (V583). Error bars represent SEs.

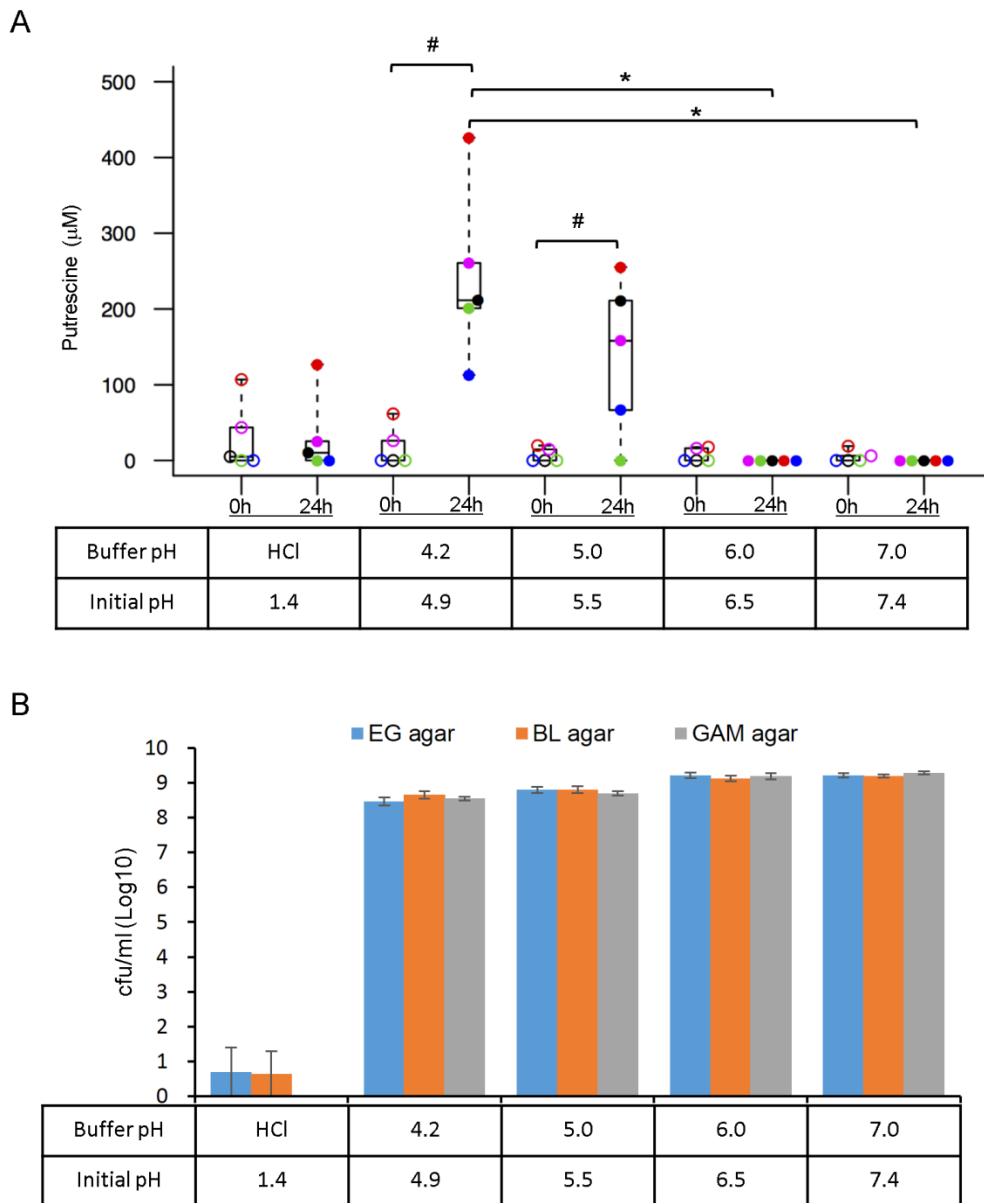

**Fig. S5. Extracellular putrescine concentration and total viable bacterial counts in human feces incubated at different pH values (n = 5)**

(A) Extracellular putrescine concentration. Same color plots indicate the same individual. Open and closed symbols indicate the putrescine concentration before and after incubation, respectively. (B) Total bacterial counts at 24 h were measured by cultivation on blood-liver (BL) agar plate, Eggerth-Gagnon (EG) agar plate, and GAM agar plate. Steel-Dwass test; \* $p < 0.05$ , Wilcoxon signed rank test; # $p < 0.05$ .

Five minutes after suspension (0 h of incubation), putrescine concentration was higher at pH 1.4 (31  $\mu\text{M}$ ) and pH 4.9 (18  $\mu\text{M}$ ) than that at pH 5.5, 6.5, and 7.4 (approximately 6  $\mu\text{M}$ ), indicating that bacterial cells were ruptured and a small amount of putrescine was released into the suspension at pH 1.4 and pH 4.9. Furthermore, after incubation for 24 h, at pH 4.2, putrescine concentration increased to 12-times the concentration (250  $\mu\text{M}$ ) observed before incubation, and the increase was observed in all samples, confirming that putrescine was produced by intestinal bacteria. In contrast, putrescine concentration was not increased at pH 1.4 because almost all bacteria were dead.

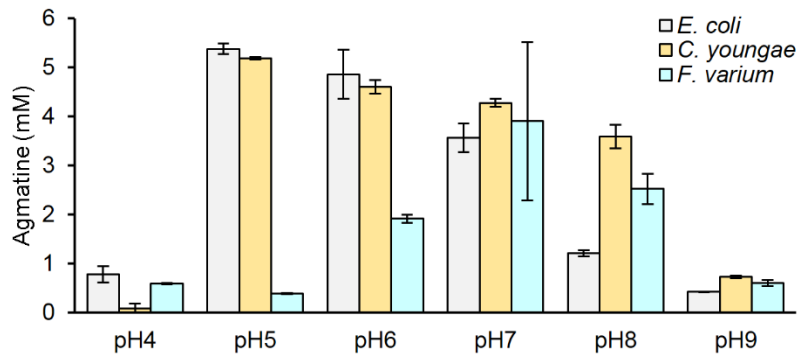

**Fig. S6. Effect of pH on extracellular agmatine concentration in monocultures of *E. coli*, *C. youngae*, and *F. varium*.**

Monoculture of these bacteria was conducted under anaerobic conditions at 37 °C for 24 h in LB-RGC (pH 4.0–9.0). *C. youngae* produced agmatine due to pH decrease similar to *E. coli*, indicating the presence of bacteria possessing the AdiC/AdiA pathway, which is triggered by environmental acidification in the gut, whereas *F. varium* did not show the same trend, and the highest agmatine production was observed at neutral pH (pH 7). These findings indicate that agmatine production does not depend on environmental acidification



## Positive

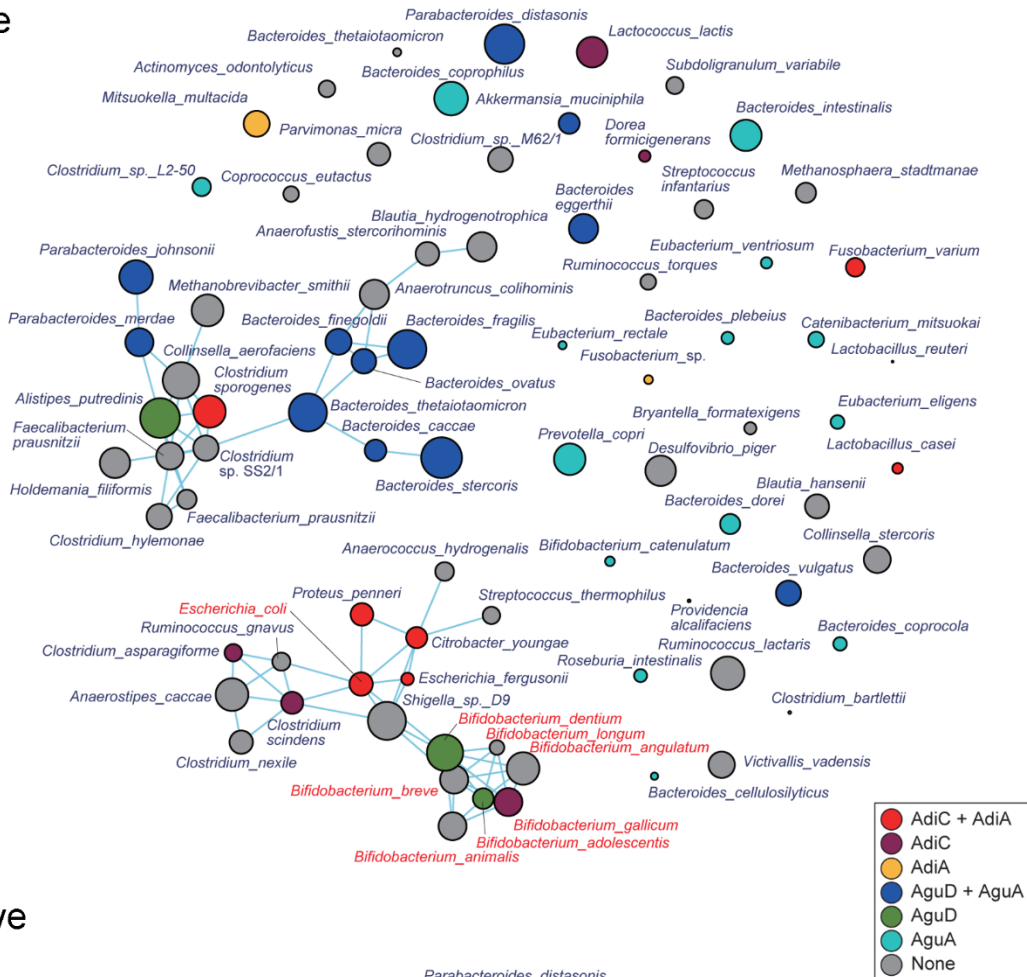

## Negative

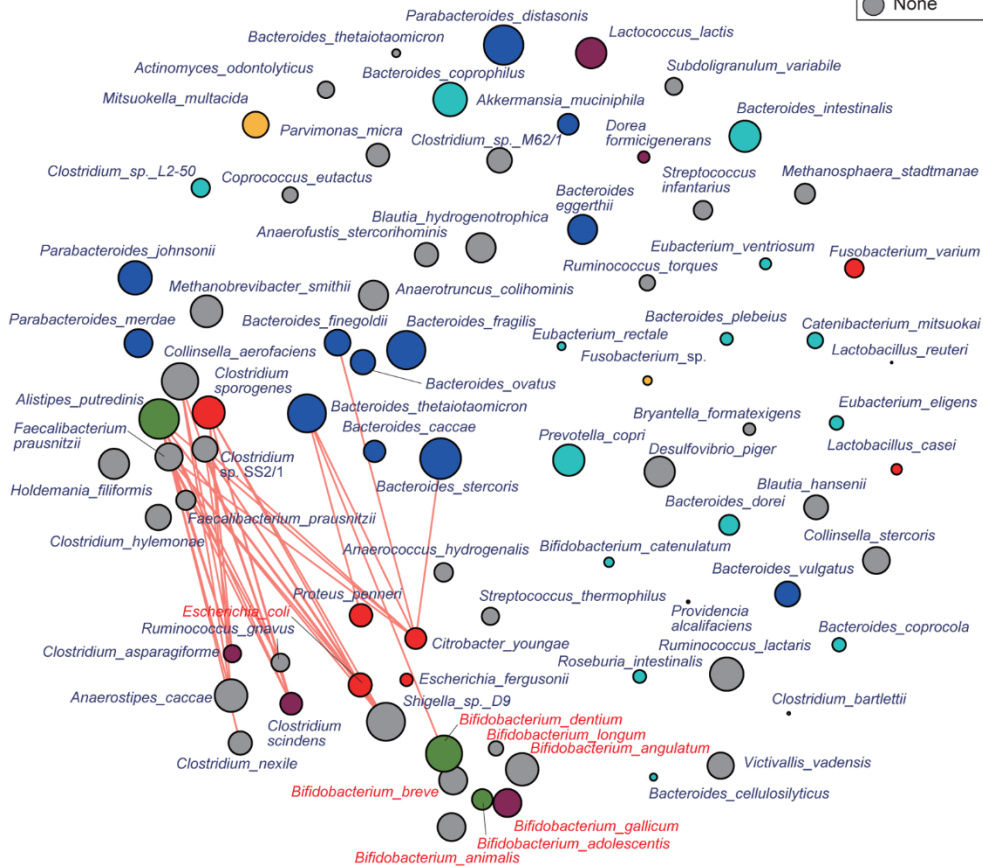

**Fig. S7. Symbiont-symbiont co-occurrence networks of key genes in the putrescine production pathway using previously described human microbiome data from US metropolitan areas . Details are shown in Fig. 5C**

## Positive

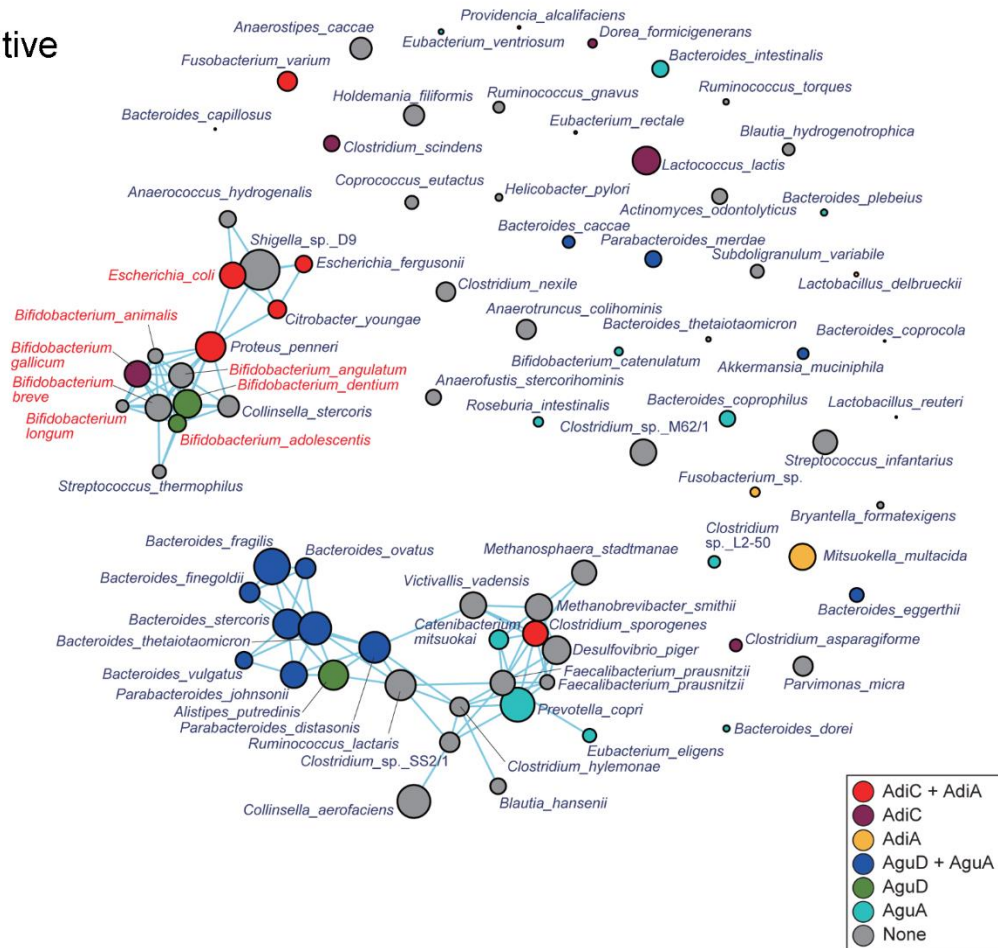

## Negative

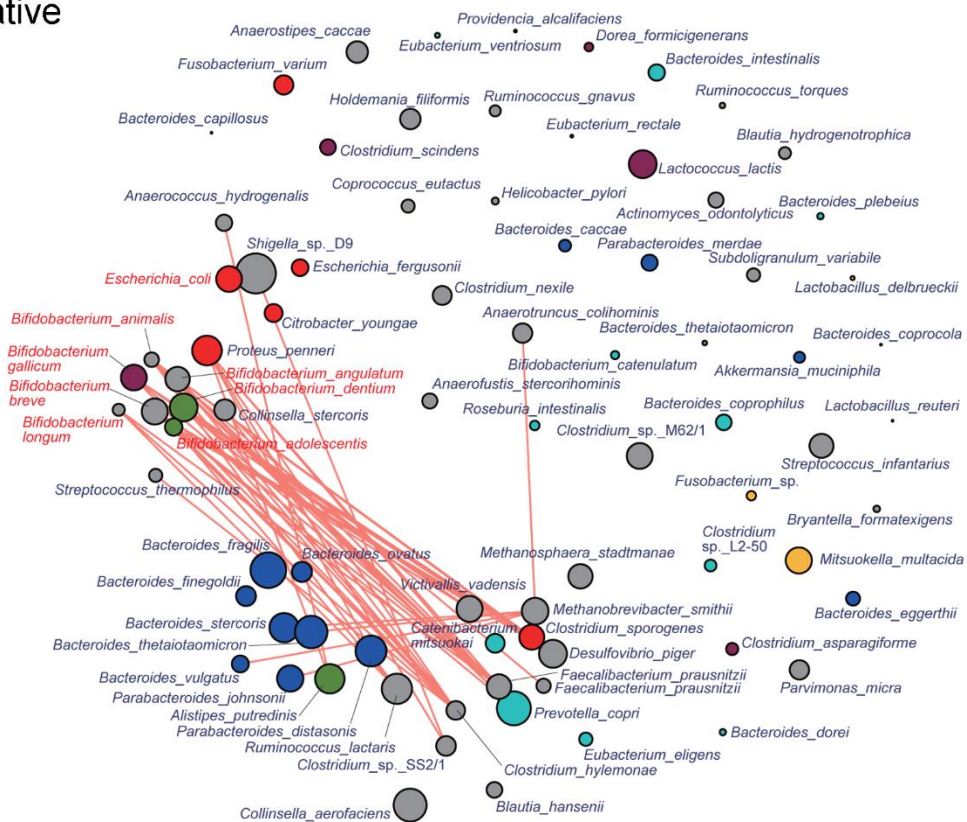

**Fig. S8. Symbiont-symbiont co-occurrence network patterns of key genes in the putrescine production pathway using previously described human microbiome data from Venezuela. Details are shown in Fig. 5C**

## Positive

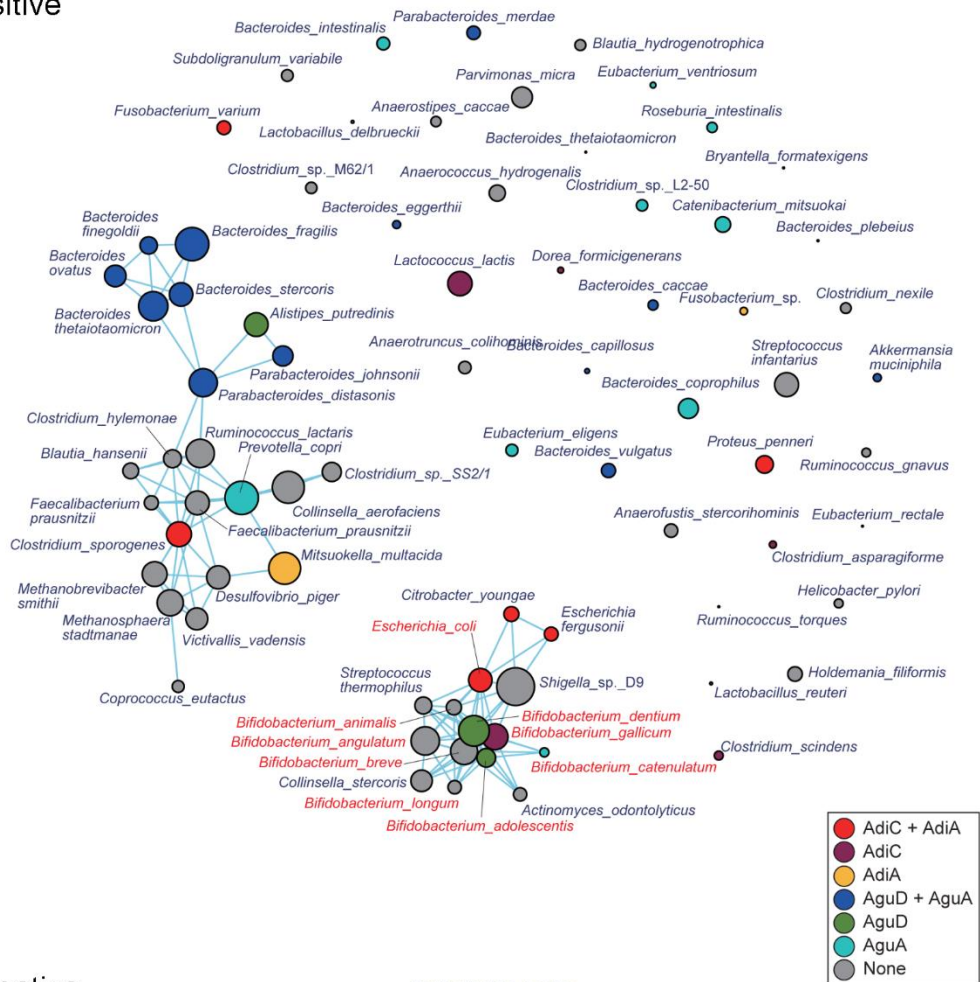

## Negative

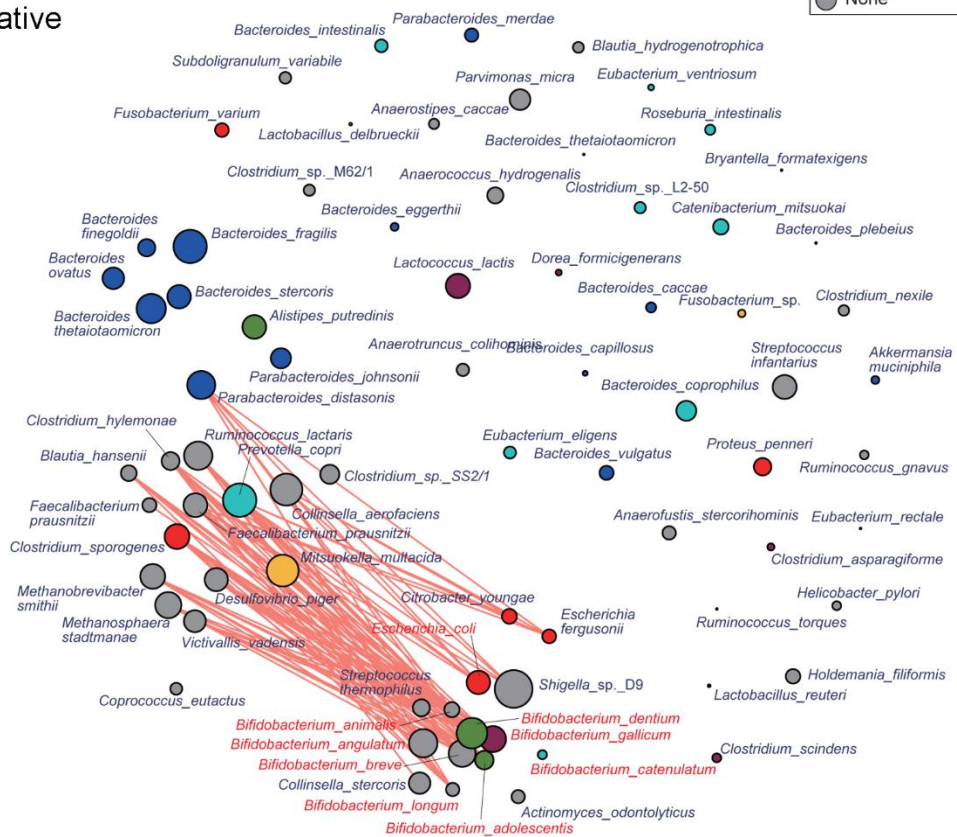

**Fig. S9. Symbiont-symbiont co-occurrence network patterns of key genes in the putrescine production pathway using previously described human microbiome data from Malawi. Details are shown in Fig. 5C.**

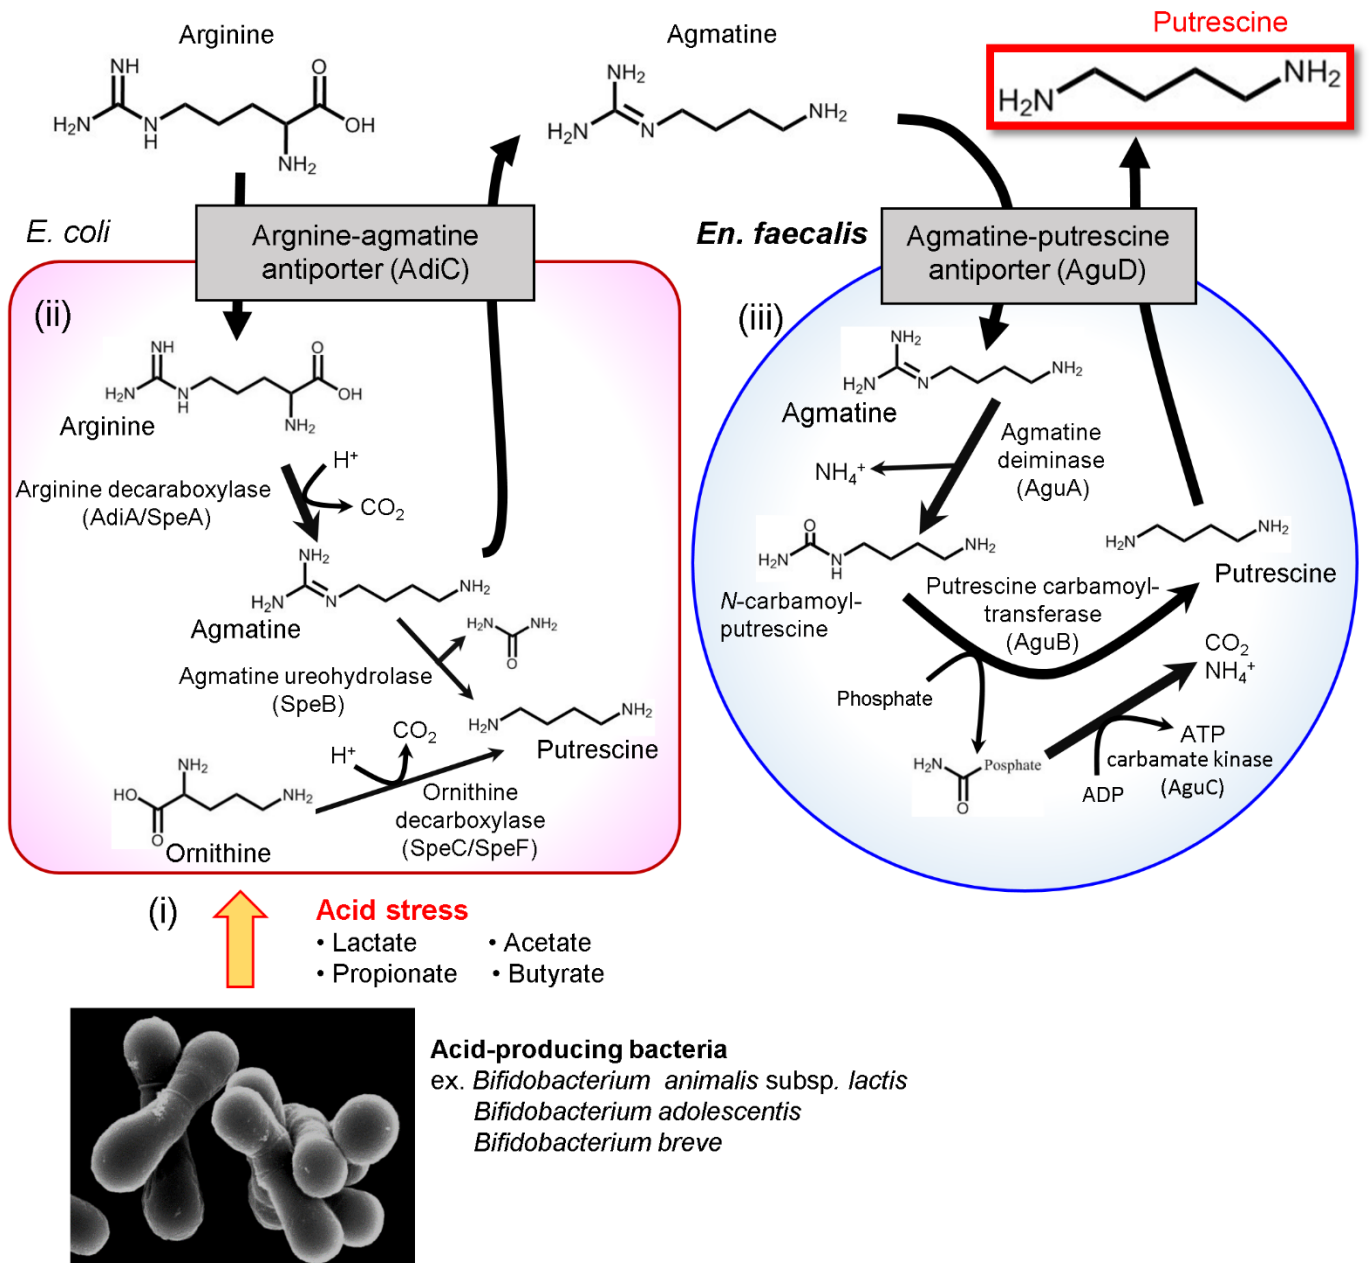

**Fig. S10. Mechanistic model of a novel pathway for putrescine production from arginine through agmatine via the collaboration of three different bacterial species**

(i) This pathway is triggered by environmental acidification due to acetate and lactate produced by acid-producing bacteria, represented by *Bifidobacterium* spp. (ii) In the second step, the acid-tolerance system of *E. coli* (arginine-dependent acid resistance system) is activated by acidic stress to exchange agmatine inside the cell for arginine present outside. (iii) In the third step, the energy production system of *En. faecalis* (agmatine deiminase system) is activated to exchange putrescine inside the cell for agmatine present outside (owing to the acid-tolerance system of *E. coli*). Putrescine is a byproduct of the collaboration between these different bacterial species

Abbreviations: Arg, arginine; Agm, agmatine; Put, putrescine; AdiA, arginine decarboxylase; AdiC, arginine/agmatine antiporter; AguA, agmatine deiminase; AguB, putrescine carbamoyltransferase; AguC, carbamate kinase; AguD, agmatine/putrescine antiporter.

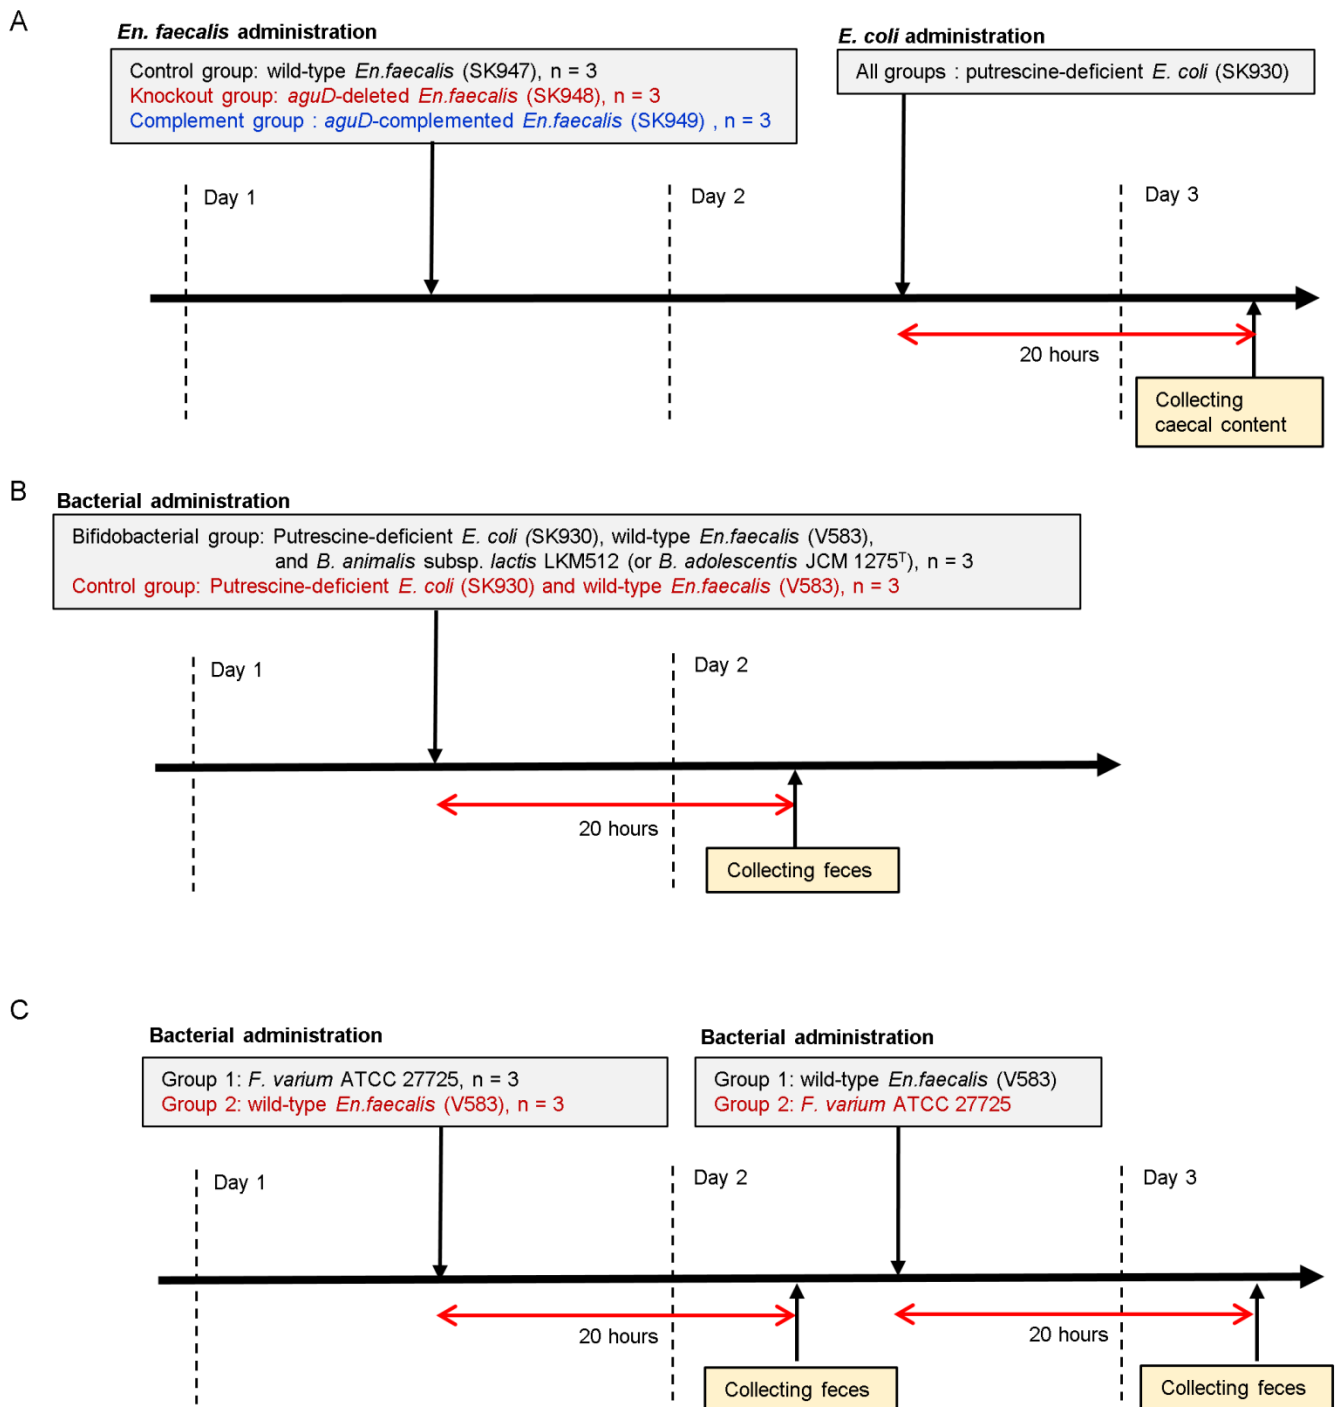

**Fig. S11. Outline of gnotobiotic mouse experiments**

(A) Gnotobiotic mice inoculated with putrescine-deficient *E. coli* (SK930) and *En. faecalis* gene knockout mutants or complementary transformants of the agmatine-putrescine antiporter (*aguD*). (B) Gnotobiotic mice inoculated with putrescine-deficient *E. coli* (SK930), wild-type *En. faecalis* (V583), and *B. animalis* subsp. *lactis* LKM512 (or *B. adolescentis*). (C) Gnotobiotic mice inoculated with *F. varium* ATCC27725 and wild-type *En. faecalis* (V583).

**Table S1. List of species expressing homologs of the enzymes AdIA and AdIC, as determined by in silico analyses of 126 bacterial strains present in the human gut**

|                                                                         | AdiC |                    | AdIA |                    | SpeA           |                    | AguA               |                    |                |
|-------------------------------------------------------------------------|------|--------------------|------|--------------------|----------------|--------------------|--------------------|--------------------|----------------|
|                                                                         | Bit  | Accession ID       | Bit  | Accession ID       | Bit            | Accession ID       | Bit                | Accession ID       |                |
| <i>Actinomyces odontolyticus</i> ATCC 17982                             |      |                    |      |                    |                |                    |                    |                    |                |
| <i>Bifidobacterium adolescentis</i> ATCC 15703                          |      |                    |      |                    |                | 111                | gb EDN82401.1      |                    |                |
| <i>Bifidobacterium adolescentis</i> L 2-37                              |      |                    |      |                    |                |                    |                    |                    |                |
| <i>Bifidobacterium animalis</i> DSM 20089                               |      |                    |      |                    |                |                    |                    |                    |                |
| <i>Bifidobacterium animalis</i> subsp. lactis AD011                     |      |                    |      |                    |                |                    |                    |                    |                |
| <i>Bifidobacterium animalis</i> subsp. lactis HN019                     |      |                    |      |                    |                |                    |                    |                    |                |
| <i>Bifidobacterium breve</i> DSM 20213                                  |      |                    |      |                    |                |                    |                    |                    |                |
| <i>Bifidobacterium catenulatum</i> DSM 16992                            |      |                    |      |                    |                |                    | 189                | ref WP_033513568.1 |                |
| <i>Bifidobacterium celeratum</i>                                        |      |                    |      |                    |                | 107                | ref WP_003839068.1 |                    |                |
| <i>Bifidobacterium gallicum</i> DSM 20093                               | 105  | gb KF59536.1       |      |                    |                |                    |                    |                    |                |
| <i>Bifidobacterium longum</i> DJ010A                                    |      |                    |      |                    |                |                    |                    |                    |                |
| <i>Bifidobacterium longum</i> NCC2705                                   |      |                    |      |                    |                |                    |                    |                    |                |
| <i>Bifidobacterium pseudocatenulatum</i> DSM 20438                      |      |                    |      |                    |                |                    |                    |                    |                |
| <i>Collinsella aerofaciens</i> ATCC 25986                               |      |                    |      |                    |                |                    |                    |                    |                |
| <i>Collinsella intestinalis</i> DSM 13280                               |      |                    |      |                    |                |                    |                    |                    |                |
| <i>Collinsella stercoris</i> DSM 13279                                  |      |                    |      |                    |                | 103                | ref WP_004329135.1 |                    |                |
| <i>Alistipes putredinis</i> DSM 17216                                   |      |                    |      |                    |                |                    |                    |                    |                |
| <i>Bacteroides caecae</i> ATCC 43185                                    |      |                    |      |                    | 545            | ref NP_076979213.1 | 168                | gb EDM22213.1      |                |
| <i>Bacteroides capillus</i> ATCC 23799                                  |      |                    |      |                    | 545            | ref NP_007786434.1 | 108                | gb EDM21916.1      |                |
| <i>Bacteroides cellulosilyticus</i> DSM 14838                           |      |                    |      |                    | 531            | ref NP_007710943.1 | 102                | ref WP_007209680.1 |                |
| <i>Bacteroides coprococcus</i> DSM 17136                                |      |                    |      |                    | 529            | gb EEDV02459.1     | 176                | gb EEF87524.1      |                |
| <i>Bacteroides coprohilus</i> DSM 18228                                 |      |                    |      |                    | 531            | gb EEF76458.1      | 155                | gb EEDU99579.1     |                |
| <i>Bacteroides dorei</i> DSM 17855                                      |      |                    |      |                    | 538            | gb EEB25237.1      | 132                | gb EEF74901.1      |                |
| <i>Bacteroides equorhi</i> DSM 20697                                    |      |                    |      |                    | 538            | gb EEB25237.1      | 129                | gb EEB24739.1      |                |
| <i>Bacteroides finlayi</i> DSM 17565                                    |      |                    |      |                    | 541            | ref WP_004291990.1 | 103                | gb EEC53335.1      |                |
| <i>Bacteroides fragilis</i> 3 1 12                                      |      |                    |      |                    | 545            | ref NP_007756434.1 | 107                | gb EEX43976.1      |                |
| <i>Bacteroides fragilis</i> NCTC 9343                                   |      |                    |      |                    | 537            | emb CAH05973.1     | 106                | emb CAH06244.1     |                |
| <i>Bacteroides fragilis</i> YCH46                                       |      |                    |      |                    | 537            | ref NP_087522.1    | 107                | ref NP_087522.1    |                |
| <i>Bacteroides intestinalis</i> DSM 17393                               |      |                    |      |                    | 533            | gb EEDV06321.1     | 159                | ref YP_099665.1    |                |
| <i>Bacteroides ovatus</i> ATCC 8483                                     |      |                    |      |                    | 547            | gb EDO12412.1      | 104                | gb EDO14173.1      |                |
| <i>Bacteroides plebeius</i> DSM 17135                                   |      |                    |      |                    | 530            | gb EEDV97001.1     | 162                | gb EEX45314.1      |                |
| <i>Bacteroides</i> sp. 11 6                                             |      |                    |      |                    |                |                    |                    |                    |                |
| <i>Bacteroides</i> sp. D1                                               |      |                    |      |                    |                |                    |                    |                    |                |
| <i>Bacteroides</i> sp. D2                                               |      |                    |      |                    |                |                    |                    |                    |                |
| <i>Bacteroides stercoris</i> ATCC 43183                                 |      |                    |      |                    | 541            | gb EDS14810.1      | 105                | gb EDS16535.1      |                |
| <i>Bacteroides thetaioamicron</i> 3731                                  |      |                    |      |                    |                |                    |                    |                    |                |
| <i>Bacteroides thetaioamicron</i> 7330                                  |      |                    |      |                    |                |                    |                    |                    |                |
| <i>Bacteroides thetaioamicron</i> VPI-5482                              |      |                    |      |                    | 550            | ref NP_812306.1    | 108                | ref NP_811486.1    |                |
| <i>Bacteroides uniformis</i> ATCC 8492                                  |      |                    |      |                    | 527            | gb EDO5269.1       | 147                | ref NP_809789.1    |                |
| <i>Bacteroides vulgatus</i> ATCC 8482                                   |      |                    |      |                    | 538            | gb ABR39026.1      | 100                | gb ABR41504.1      |                |
| <i>Bacteroides</i> WH2                                                  |      |                    |      |                    |                |                    |                    |                    |                |
| <i>Bacteroides xylosoxydans</i> XB1A                                    |      |                    |      |                    | 549            | emb CBK67757.1     | 106                | emb CBK66780.1     |                |
| <i>Parabacteroides distasonis</i> ATCC 8503                             |      |                    |      |                    |                |                    | 108                | ref NP_005857294.1 |                |
| <i>Parabacteroides johnsonii</i> DSM 18315                              |      |                    |      |                    | 538            | gb EEC95655.1      | 111                | gb EEC97972.1      |                |
| <i>Parabacteroides merdae</i> ATCC 43184                                |      |                    |      |                    | 541            | gb EDN84739.1      | 112                | gb EDN84739.1      |                |
| <i>Prevotella copri</i> DSM 18205                                       |      |                    |      |                    | 519            | gb EFB33967.1      | 112                | gb EDN84739.1      |                |
| <i>Methanobrevibacter smithii</i> ATCC 35061                            |      |                    |      |                    |                |                    |                    |                    |                |
| <i>Methanobrevibacter smithii</i> DSM 2374                              |      |                    |      |                    |                |                    |                    |                    |                |
| <i>Methanobrevibacter smithii</i> DSM 2375                              |      |                    |      |                    |                |                    |                    |                    |                |
| <i>Methanosphaera stadtmanae</i> DSM 3091                               |      |                    |      |                    |                |                    |                    |                    |                |
| <i>Anaerococcus hydrogenalis</i> DSM 7454                               |      |                    |      |                    |                |                    |                    |                    |                |
| <i>Anaerofustis stercorihominis</i> DSM 17244                           |      |                    |      |                    |                |                    |                    |                    |                |
| <i>Anaerostipes caccæ</i> DSM 14662                                     |      |                    |      |                    |                |                    |                    |                    |                |
| <i>Anaerotruncus colibiformis</i> DSM 17241                             |      |                    |      |                    |                |                    |                    |                    |                |
| <i>Blautia hansenii</i> DSM 20583                                       |      |                    |      |                    |                |                    |                    |                    |                |
| <i>Blautia hydroxynitrohalica</i> DSM 10507                             |      |                    |      |                    |                |                    |                    |                    |                |
| <i>Butyrivibrio formatorgens</i> DSM 14469                              |      |                    |      |                    |                |                    |                    |                    |                |
| <i>Butyrivibrio crossotus</i> DSM 2876                                  |      |                    |      |                    |                |                    |                    | 301                | gb EFF68065.1  |
| <i>Catenibacterium mitsuokai</i> DSM 15897                              |      |                    |      |                    |                |                    |                    | 338                | gb EFF93927.1  |
| <i>Clostridium asparaniforme</i> DSM 15981                              | 105  | gb EEG57719.1      |      |                    |                |                    |                    |                    |                |
| <i>Clostridium bartlettii</i> DSM 16795                                 |      |                    |      |                    |                |                    |                    |                    |                |
| <i>Clostridium botulinum</i> ATCC BAA-113                               |      |                    |      |                    |                |                    |                    |                    |                |
| <i>Clostridium hiranonis</i> DSM 13275                                  |      |                    |      |                    |                |                    |                    |                    |                |
| <i>Clostridium tylenoneae</i> DSM 15053                                 |      |                    |      |                    |                |                    |                    |                    |                |
| <i>Clostridium leptum</i> DSM 753                                       |      |                    |      |                    |                |                    |                    |                    |                |
| <i>Clostridium methyloxylosum</i> DSM 5476                              |      |                    |      |                    |                |                    |                    |                    |                |
| <i>Clostridium nexile</i> DSM 1787                                      |      |                    |      |                    |                |                    |                    |                    |                |
| <i>Clostridium ramosum</i> DSM 1402                                     |      |                    |      |                    |                |                    |                    |                    |                |
| <i>Clostridium scindens</i> ATCC 35704                                  | 104  | gb EDS08131.1      |      |                    |                |                    |                    |                    |                |
| <i>Clostridium</i> sp. L2-50                                            |      |                    |      |                    |                |                    |                    | 534                | gb EDO66807.1  |
| <i>Clostridium</i> sp. M621                                             |      |                    |      |                    |                |                    |                    |                    |                |
| <i>Clostridium</i> sp. SS21                                             |      |                    |      |                    |                |                    |                    |                    |                |
| <i>Clostridium sporiforme</i> DSM 1552                                  |      |                    |      |                    |                |                    |                    |                    |                |
| <i>Clostridium sporogenes</i> ATCC 15579                                | 204  | gb EDU38352.1      | 132  | gb EDU39429.1      |                |                    | 152                | gb EDU37786.1      |                |
| <i>Clostridium symbiosum</i>                                            |      |                    |      |                    |                |                    |                    |                    |                |
| <i>Coccoloccus comes</i> ATCC 27768                                     |      |                    |      |                    |                |                    |                    |                    |                |
| <i>Coccoloccus eutactus</i> ATCC 27769                                  |      |                    |      |                    |                |                    |                    |                    |                |
| <i>Dorea formicigenerans</i> ATCC 27755                                 | 104  | ref WP_005330286.1 |      |                    |                |                    |                    |                    |                |
| <i>Dorea longicatena</i> DSM 13814                                      |      |                    |      |                    |                |                    |                    |                    |                |
| <i>Eubacterium bifforme</i> DSM 3989                                    |      |                    |      |                    |                |                    |                    |                    |                |
| <i>Eubacterium dolium</i> DSM 3991                                      |      |                    |      |                    |                |                    |                    |                    |                |
| <i>Eubacterium eligens</i> ATCC 27750                                   |      |                    |      |                    |                |                    |                    | 334                | gb ACR72415.1  |
| <i>Eubacterium hallii</i> DSM 3353                                      |      |                    |      |                    |                |                    |                    |                    |                |
| <i>Eubacterium rectale</i> ATCC 33656                                   |      |                    |      |                    |                |                    |                    | 316                | gb ACR77067.1  |
| <i>Eubacterium rectale</i> DSM 17629                                    |      |                    |      |                    |                |                    |                    | 320                | emb CBK99636.1 |
| <i>Eubacterium ventriosum</i> ATCC 27560                                |      |                    |      |                    |                |                    |                    | 315                | emb CRL40832.1 |
| <i>Faecalibacterium prausnitzii</i> A2-165                              |      |                    |      |                    |                |                    |                    |                    |                |
| <i>Faecalibacterium prausnitzii</i> M212                                |      |                    |      |                    |                |                    |                    |                    |                |
| <i>Hoblermanii</i> DSM 12042                                            |      |                    |      |                    |                |                    |                    |                    |                |
| <i>Lactobacillus casei</i> ATCC 334                                     | 111  | gb BAN74254.1      | 279  | ref NP_011674560.1 |                |                    |                    |                    |                |
| <i>Lactobacillus delbrueckii</i> subsp. <i>bulgaricus</i> ATCC 11842    |      |                    |      | 308                | emb CAI98549.1 |                    |                    |                    |                |
| <i>Lactobacillus reuteri</i> DSM 20018                                  | 119  | gb ABQ83632.1      |      |                    |                |                    |                    |                    |                |
| <i>Lactococcus lactis</i> subsp. <i>cremoris</i> MG1363                 | 102  | emb CAL98875.1     |      |                    |                |                    |                    |                    |                |
| <i>Lactococcus lactis</i> subsp. <i>cremoris</i>                        | 102  | emb CAB93581.2     |      |                    |                |                    |                    |                    |                |
| <i>Lactococcus lactis</i> subsp. <i>lactis</i> 11403                    | 101  | ref NP_268192.1    |      |                    |                |                    |                    |                    |                |
| M23A                                                                    |      |                    |      |                    |                |                    |                    |                    |                |
| <i>Mitsuokella multacida</i> DSM 20544                                  |      |                    | 101  | gb EEX68878.1      |                |                    |                    |                    |                |
| <i>Parvimonas micro</i> ATCC 33270                                      |      |                    |      |                    |                |                    |                    |                    |                |
| <i>Roseburia intestinalis</i> L1-82                                     |      |                    |      |                    |                |                    |                    | 305                | gb EEV01176.1  |
| <i>Ruminococcus bromii</i> L263                                         |      |                    |      |                    |                |                    |                    |                    |                |
| <i>Ruminococcus gnavus</i> ATCC 29149                                   |      |                    |      |                    |                |                    |                    |                    |                |
| <i>Ruminococcus lactis</i> ATCC 29176                                   |      |                    |      |                    |                |                    |                    |                    |                |
| <i>Ruminococcus obeum</i> ATCC 29174                                    |      |                    |      |                    |                |                    |                    |                    |                |
| <i>Ruminococcus torques</i> ATCC 27756                                  |      |                    |      |                    |                |                    |                    |                    |                |
| <i>Streptococcus infantarius</i> subsp. <i>infantarius</i> ATCC BAA-102 |      |                    |      |                    |                |                    |                    |                    |                |
| <i>Streptococcus thermophilus</i> CNRZ1086                              |      |                    |      |                    |                |                    |                    |                    |                |
| <i>Streptococcus thermophilus</i> LMD-9                                 |      |                    |      |                    |                |                    |                    |                    |                |
| <i>Streptococcus thermophilus</i> LMG 18311                             |      |                    |      |                    |                |                    |                    |                    |                |
| <i>Subdoligranulum variabile</i> DSM 15176                              |      |                    |      |                    |                |                    |                    |                    |                |
| <i>Fusobacterium</i> sp. 41 13                                          |      |                    | 122  | gb EEO39391.1      |                |                    |                    |                    |                |
| <i>Fusobacterium varium</i> ATCC 27725                                  | 125  | gb EE895190.1      | 1009 | gb EES866191.1     |                |                    |                    |                    |                |
| <i>Citrobacter youngae</i> ATCC 29220                                   | 849  | gb EFF05427.1      | 1514 | gb EFF05425.1      | 1280           | gb EFF06567.1      |                    |                    |                |
| <i>Desulfovibrio piger</i> ATCC 29098                                   |      |                    |      |                    | 432            | gb EEB32660.1      |                    |                    |                |
| <i>Desulfovibrio piger</i> GOR1                                         |      |                    |      |                    | 462            | WP_040369942.1     |                    |                    |                |
| <i>Enterobacter cancerogenus</i>                                        | 259  | ref WP_006177175.1 | 454  | ref WP_034829451.1 | 1292           | ref NP_042321927.1 |                    |                    |                |
| <i>Escherichia coli</i> str. K-12 substr. MG1655                        | 881  | ref NP_416539.1    | 1509 | ref NP_418541.2    | 1368           | ref NP_417413.1    |                    |                    |                |
| <i>Escherichia ferusonii</i> ATCC 35469                                 | 295  | emb CAQ89410.1     | 481  | emb CAQ89409.1     | 1361           | emb CAQ89371.1     |                    |                    |                |
| <i>Helicobacter pylori</i> HPAG1                                        |      |                    |      |                    | 325            | gb AER85039.1      |                    |                    |                |
| <i>Proteus penneri</i> ATCC 35198                                       | 113  | gb EEG86390.1      | 587  | gb EEO39391.1      | 924            | gb EEB38448.1      |                    |                    |                |
| <i>Providencia alcalifaciens</i> DSM 30120                              | 122  | gb EEB44926.1      | 1155 | gb EEB44562.1      | 1044           | gb EEB44175.1      |                    |                    |                |
| <i>Providencia rettgeri</i> DSM 1131                                    | 121  | gb EEF55447.1      | 1159 | gb EEF52717.1      | 1039           | gb EEF53196.1      | 101                | gb EEB44240.1      |                |
| <i>Providencia rustiganii</i> DSM 4541                                  | 121  | gb EEF71127.1      | 1159 | gb EEF72852.1      | 1043           | gb EEF71688.1      |                    |                    |                |
| <i>Providencia stuartii</i> ATCC 25827                                  | 117  | gb EDU59312.1      | 1170 | gb EDU61801.1      | 1044           | gb EDU60243.1      |                    |                    |                |
| <i>Shigella</i> sp. D9                                                  |      |                    |      |                    |                |                    |                    |                    |                |
| <i>Akkermansia muciniphila</i> ATCC BAA-835                             |      |                    |      |                    | 479            | gb ACD05477.1      | 115                | gb ACD03884.1      |                |
| <i>Vivivallis vadensis</i> ATCC BAA-548                                 |      |                    |      |                    |                |                    | 204                | gb ACD03862.1      |                |

Data from 126 bacterial strains was obtained from article of Yatsunen et al. (Nature 486: 222-227, 2012)

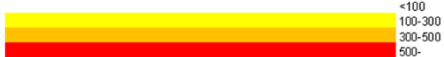



**Table S3. List of bacteria used for screening of polyamine producing bacteria**

| Strains                                                   | Phylum         |
|-----------------------------------------------------------|----------------|
| <i>Alistipes putredinis</i> JCM16772                      | Bacteroidetes  |
| <i>Bacteroides caccae</i> JCM9498                         | Bacteroidetes  |
| <i>Bacteroides thetaiotaomicron</i> JCM 5827 <sup>T</sup> | Bacteroidetes  |
| <i>Bacteroides uniformis</i> JCM5828                      | Bacteroidetes  |
| <i>Bacteroides vulgatus</i> JCM 5826 <sup>T</sup>         | Bacteroidetes  |
| <i>Bifidobacterium adolescentis</i> JCM 1275 <sup>T</sup> | Actinobacteria |
| <i>Bifidobacterium longum</i> JCM 1217 <sup>T</sup>       | Actinobacteria |
| <i>Blautia hansenii</i> JCM14655 <sup>T</sup>             | Firmicutes     |
| <i>Clostridium leptum</i> DSM753                          | Firmicutes     |
| <i>Enterococcus faecalis</i> JCM 5803 <sup>T</sup>        | Firmicutes     |
| <i>Escherichia coli</i> JCM 5491                          | Proteobacteria |
| <i>Parabacteroides johnsonii</i> JCM13406                 | Bacteroidetes  |
| <i>Parabacteroides merdae</i> JCM9497                     | Bacteroidetes  |
| <i>Streptococcus thermophiles</i> NBRC13957               | Firmicutes     |



**Table S4. Strains, plasmids, and oligonucleotides used in this study**

| Strain, plasmid, or oligonucleotide                   | Characteristic or sequence                                                                                                   | Source or reference                                      |
|-------------------------------------------------------|------------------------------------------------------------------------------------------------------------------------------|----------------------------------------------------------|
| <b>Strains</b>                                        |                                                                                                                              |                                                          |
| <i>Escherichia coli</i> K-12                          |                                                                                                                              |                                                          |
| JW4076                                                | ME9062 except $\Delta$ adiC :: FRT-kan <sup>+</sup> -FRT                                                                     | Baba et al. 2006                                         |
| JW5731                                                | ME9062 except $\Delta$ adiA :: FRT-kan <sup>+</sup> -FRT                                                                     | Baba et al. 2006                                         |
| LKM10096                                              | pBeloBAC11/MG1655                                                                                                            | This study                                               |
| LKM10097                                              | pBelobac11/SK903                                                                                                             | This study                                               |
| LKM10100                                              | pBelobac11-adiC <sup>+</sup> /SK903                                                                                          | This study                                               |
| ME9062                                                | <i>rrmB</i> $\Delta$ lacZ4787 <i>hsdR514</i> $\Delta$ ( <i>araBAD</i> )567 $\Delta$ ( <i>rhaBAD</i> )568 <i>rph-1</i>        | Baba et al. 2006                                         |
| MG1655                                                | F prototrophic                                                                                                               | C. A. Gross                                              |
| SK900                                                 | MG1655 except $\Delta$ adiA :: FRT-kan <sup>+</sup> -FRT                                                                     | This study                                               |
| SK901                                                 | MG1655 except $\Delta$ adiA :: FRT                                                                                           | This study                                               |
| SK902                                                 | MG1655 except $\Delta$ adiC :: FRT-kan <sup>+</sup> -FRT                                                                     | This study                                               |
| SK903                                                 | MG1655 except $\Delta$ adiC :: FRT                                                                                           | This study                                               |
| SK912                                                 | pBelobac11-adiA <sup>+</sup> /SK901                                                                                          | This study                                               |
| SK914                                                 | pBelobac11/SK901                                                                                                             | This study                                               |
| SK930                                                 | pBelobac11/MG1655 except $\Delta$ speB :: FRT $\Delta$ speC :: FRT $\Delta$ speF :: FRT                                      | This study                                               |
| <i>Enterococcus faecalis</i>                          |                                                                                                                              |                                                          |
| SK932                                                 | pLT06- $\Delta$ aguD/V583                                                                                                    | This study                                               |
| SK934                                                 | V583 except $\Delta$ aguD <i>lacZ</i> <sup>+</sup> <i>cat</i> <sup>+</sup> <i>pheS</i> <sup>+</sup> <i>aguD</i> <sup>+</sup> | This study                                               |
| SK937                                                 | V583 except $\Delta$ aguD                                                                                                    | This study                                               |
| SK947                                                 | pLZ12/V583                                                                                                                   | This study                                               |
| SK948                                                 | pLZ12/SK937                                                                                                                  | This study                                               |
| SK949                                                 | pLZ12- <i>aguB</i> <sup>+</sup> <i>D</i> <sup>+</sup> /SK937                                                                 | This study                                               |
| V583                                                  | Clinical isolate, TIGR sequence strain; Van <sup>R</sup>                                                                     | American Type Culture Collection                         |
| <b>Plasmids</b>                                       |                                                                                                                              |                                                          |
| harbouring genes of <i>E. coli</i> K-12 MG1655        |                                                                                                                              |                                                          |
| pBelobac11                                            | Mini-F replicon <i>cat</i> <sup>+</sup>                                                                                      | New England Biolabs Inc.,<br>Beverly, Massachusetts, USA |
| pBelobac11- <i>adiA</i> <sup>+</sup>                  | Mini-F replicon <i>cat</i> <sup>+</sup> <i>adiA</i> <sup>+</sup>                                                             | This study                                               |
| pBelobac11- <i>adiC</i> <sup>+</sup>                  | Mini-F replicon <i>cat</i> <sup>+</sup> <i>adiC</i> <sup>+</sup>                                                             | This study                                               |
| harbouring genes of <i>En. faecalis</i> V583          |                                                                                                                              |                                                          |
| pLT06                                                 | <i>repA</i> -ts replicon <i>pheS</i> <sup>+</sup> - <i>cat</i> <sup>+</sup> - <i>lacZ</i> <sup>+</sup>                       | Thurlow et al. 2009                                      |
| pLT06- $\Delta$ aguD                                  | <i>repA</i> -ts replicon $\Delta$ aguD <i>pheS</i> <sup>+</sup> <i>cat</i> <sup>+</sup> <i>lacZ</i> <sup>+</sup>             | This study                                               |
| pLZ12                                                 | pSH71 replicon <i>cat</i> <sup>+</sup>                                                                                       | Perez-Casal et al. 1991                                  |
| pLZ12- <i>aguB</i> <sup>+</sup> <i>D</i> <sup>+</sup> | pSH71 replicon <i>cat</i> <sup>+</sup> <i>aguB</i> <sup>+</sup> <i>D</i> <sup>+</sup>                                        | This study                                               |
| <b>Oligonucleotides</b>                               |                                                                                                                              |                                                          |
| adiA_300bp-up_for                                     | ccgtgccggcagcgtTCAAGTAGTCGTTTTTACAG                                                                                          |                                                          |
| adiA_term_rev                                         | ggatgcagcccggTTTACGCTTTCACGCACATAA                                                                                           |                                                          |
| adiC_300bp-up_for                                     | ccgtgccggcagcgtAAAAGTTGAAAAGCGAAAAC                                                                                          |                                                          |
| adiC_term_rev                                         | ggatgcagcccggTTAATCTTTGCTTATTGGTG                                                                                            |                                                          |
| Clone_agcB+0.5K_FWD                                   | tgaattcattagatcGTGCGGTCATAAAGGTCTGA                                                                                          |                                                          |
| Clone_agcD+COMPL                                      | aggaagatctggatcTTAGCCATTTTCTTTCGTTCCCTT                                                                                      |                                                          |
